# Supplementary material for: Individual and group level trajectories of behavioural development in Border collies
Source: PubMed Central journal article supplement — Appl Anim Behav Sci. Author manuscript; Available in PMC 2017 Feb 7. (PMC5295634; doi:10.1016/j.applanim.2016.04.021), 2016-07
Supplement: NIHMS71394-supplement-Appendix.pdf [file NIHMS71394-supplement-Appendix.pdf]

## Appendix A.

Factors, facets and individual questions of the DPQ (short form, Jones, 2008) and internal consistency of factors, calculated from the German translation of the questionnaire (Turcsán et al., in prep.). Numbers in the second column represent the original numbers of the questions in the questionnaire. In the current study, the owners were asked to rate their agreement with the German translation of the statements on a 5-point Likert scale (“sehr unzutreffend”, “eher unzutreffend”, “teils-teils”, “eher zutreffend”, “sehr zutreffend”), which can be freely translated as “disagree strongly”, “tend to disagree”, “partly-partly”, “tend to agree”, “agree strongly”.

| Factor 1 – Fearfulness               | Cronbach's alpha: 0.793                                                                                                  |
|--------------------------------------|--------------------------------------------------------------------------------------------------------------------------|
| Facet 1 – Fear of People             |                                                                                                                          |
| 1*                                   | Dog is relaxed when greeting people.                                                                                     |
| 6                                    | Dog is shy.                                                                                                              |
| 27                                   | Dog behaves fearfully towards unfamiliar people.                                                                         |
| Facet 2 – Nonsocial Fear             |                                                                                                                          |
| 3                                    | Dog is anxious.                                                                                                          |
| 11*                                  | Dog is confident.                                                                                                        |
| 22*                                  | Dog adapts easily to new situations and environments.                                                                    |
| Facet 3 – Fear of Dogs               |                                                                                                                          |
| 13                                   | Dog avoids other dogs.                                                                                                   |
| 21                                   | Dog behaves submissively (e.g., rolls over, avoids eye contact, licks lips) when greeting other dogs.                    |
| 42                                   | Dog behaves fearfully towards other dogs.                                                                                |
| Facet 4 – Fear of Handling           |                                                                                                                          |
| 16                                   | Dog behaves fearfully during visits to the veterinarian.                                                                 |
| 35                                   | Dog exhibits fearful behaviours when restrained.                                                                         |
| 44                                   | Dog behaves fearfully when groomed (e.g., nails trimmed, brushed, bathed, ears cleaned).                                 |
| Factor 2 – Aggression towards People | Cronbach's alpha: 0.707                                                                                                  |
| Facet 1 – General Aggression         |                                                                                                                          |
| 7                                    | Dog behaves aggressively towards unfamiliar people.                                                                      |
| 18*                                  | Dog is friendly towards unfamiliar people.                                                                               |
| 40                                   | Dog shows aggression when nervous or fearful.                                                                            |
| Facet 2 – Situational Aggression     |                                                                                                                          |
| 25                                   | Dog behaves aggressively in response to perceived threats from people (e.g., being cornered, having collar reached for). |
| 30                                   | Dog behaves aggressively during visits to the veterinarian.                                                              |
| 36                                   | Dog aggressively guards coveted items (e.g., stolen item, treats, food bowl).                                            |
| Factor 3 – Activity/Excitability     | Cronbach's alpha: 0.683                                                                                                  |
| Facet 1 – Excitability               |                                                                                                                          |
| 15                                   | Dog is boisterous.                                                                                                       |
| 31                                   | Dog seeks constant activity.                                                                                             |
| 41*                                  | Dog tends to be calm.                                                                                                    |
| Facet 2 – Playfulness                |                                                                                                                          |
| 9*                                   | Dog gets bored in play quickly.                                                                                          |
| 17                                   | Dog enjoys playing with toys.                                                                                            |
| 33                                   | Dog retrieves objects (e.g., balls, toys, sticks).                                                                       |

## Facet 3 – Active Engagement

- 4\* Dog is lethargic  
 14 Dog works at tasks (e.g., getting treats out of a Kong, shredding toys) until entirely finished.  
 24 Dog is curious.

## Facet 4 – Companionability

- 20 Dog seeks companionship from people.  
 26\* Dog is aloof.  
 37 Dog is affectionate.

## Factor 4 – Responsiveness to Training

Cronbach's alpha: 0.646

## Facet 1 – Trainability

- 29\* Dog is slow to respond to corrections.  
 38\* Dog ignores commands.  
 43 Dog is able to focus on a task in a distracting situation (e.g., loud or busy places, around other dogs).

## Facet 2 – Controllability

- 5 When off leash, dog comes immediately when called.  
 10\* Dog is quick to sneak out through open doors, gates.  
 32 Dog leaves food or objects alone when told to do so.

## Factor 5 – Aggression towards Animals

Cronbach's alpha: 0.673

## Facet 1 – Aggression towards Dogs

- 2 Dog behaves aggressively toward dogs.  
 19\* Dog is playful with other dogs.  
 34\* Dog is friendly towards other dogs.

## Facet 2 – Prey Drive

- 8 Dog likes to chase squirrels, birds, or other small animals.  
 23 Dog likes to chase bicycles, joggers, and skateboarders.  
 39 Dog behaves aggressively towards cats.

## Facet 3 – Dominance over other Dogs

- 12 Dog is dominant over other dogs.  
 28\* Dog willingly shares toys with other dogs.  
 45 Dog is assertive or pushy with other dogs (e.g., if in a home with other dogs, when greeting).

Note: Items marked with an asterisk are reverse coded items.

## Appendix B.

Mean (bolded) and interquartile range of DPQ factor scores in the three age groups

| Age group    | Fearfulness                | Aggression towards People | Activity/Excitability    | Responsiveness to Training | Aggression towards Animals |
|--------------|----------------------------|---------------------------|--------------------------|----------------------------|----------------------------|
| 6 months     | <b>21.32</b> (16–25)       | <b>7.89</b> (6–9)         | <b>51.56</b> (49–54)     | <b>21.13</b> (18–24)       | <b>17.91</b> (14–21)       |
| 12 months    | <b>23.81</b> (18.25–28.75) | <b>8.50</b> (6–9.75)      | <b>51.54</b> (48–55)     | <b>22.20</b> (20–24)       | <b>18.96</b> (15–22)       |
| 18–24 months | <b>24.27</b> (19–28.5)     | <b>8.99</b> (6–10)        | <b>50.96</b> (47.5–54.5) | <b>22.99</b> (20.5–26)     | <b>19.85</b> (16–22.5)     |

## Appendix C.

Intra-class correlation coefficients (two way random, absolute consistency, single measures) between facets at 6, 12 and 18 months. All results are significant after correction for multiple testing.

| Facet                     | ICC  | P      |
|---------------------------|------|--------|
| Fear of People            | 0.68 | <0.001 |
| Nonsocial Fear            | 0.65 | <0.001 |
| Fear of Dogs              | 0.58 | <0.001 |
| Fear of Handling          | 0.56 | <0.001 |
| General Aggression        | 0.64 | <0.001 |
| Situational Aggression    | 0.45 | <0.001 |
| Excitability              | 0.55 | <0.001 |
| Playfulness               | 0.64 | <0.001 |
| Engagement                | 0.39 | <0.001 |
| Companionability          | 0.41 | <0.001 |
| Trainability              | 0.51 | <0.001 |
| Controllability           | 0.47 | <0.001 |
| Aggression towards Dogs   | 0.53 | <0.001 |
| Prey Drive                | 0.63 | <0.001 |
| Dominance over other Dogs | 0.59 | <0.001 |

## Appendix D.

Results of minimal GLMMs testing for differences in DPQ facets between age groups. Variables that were log<sub>10</sub>, double log or square-root transformed or were normally distributed without transformation were analysed with GLMMs assuming a normal distribution (F statistics presented). Variables transformed into binary variables were analysed with binomial models (Chi<sup>2</sup> statistics presented). Litter effects, if significant, are indicated in the column "Random effect(s) of best model". All significant results for the full models remain significant after FDR correction for multiple testing.

| Dependent variable        | Transformation | Random effect(s)<br>of best model | Test statistic (DF)   | P full model | Within model<br>comparison                                | P 6 vs 12 months<br>and 12 vs 18<br>months |
|---------------------------|----------------|-----------------------------------|-----------------------|--------------|-----------------------------------------------------------|--------------------------------------------|
| Fear of People            | log10          | ID nested within litter           | $F_{(2,138)} = 7.72$  | 0.0007       | 6 vs 12 months<br>12 vs 18–24 months<br>6 vs 18–24 months | 0.002<br>0.737<br>0.0006                   |
| Nonsocial Fear            | log10          | ID                                | $F_{(2,138)} = 8.85$  | 0.0002       | 6 vs 12 months<br>12 vs 18–24 months<br>6 vs 18–24 months | 0.020<br>0.064<br>0.0001                   |
| Fear of Dogs              | log10          | ID                                | $F_{(2,138)} = 0.57$  | 0.57         | 6 vs 12 months<br>12 vs 18–24 months<br>6 vs 18–24 months | 0.414<br>0.317<br>0.825                    |
| Fear of Handling          | double log     | ID nested within litter           | $F_{(2,138)} = 7.38$  | 0.0009       | 6 vs 12 months<br>12 vs 18–24 months<br>6 vs 18–24 months | 0.002<br>0.651<br>0.0007                   |
| General aggression        | binary         | ID; Litter (p = 0.007)            | $X^2_{(2)} = 253.61$  | 0.2636       | 6 vs 12 months<br>12 vs 18–24 months<br>6 vs 18–24 months | 0.237<br>0.699<br>0.127                    |
| Situational aggression    | binary         | ID; Litter                        | $X^2_{(2)} = 280.35$  | 0.009        | 6 vs 12 months<br>12 vs 18–24 months<br>6 vs 18–24 months | 0.873<br>0.006<br>0.008                    |
| Excitability              | log10          | ID                                | $F_{(2,138)} = 2.95$  | 0.056        | 6 vs 12 months<br>12 vs 18–24 months<br>6 vs 18–24 months | 0.020<br>0.097<br>0.551                    |
| Playfulness               | binary         | ID                                | $X^2_{(2)} = 274.66$  | 0.8679       | 6 vs 12 months<br>12 vs 18–24 months<br>6 vs 18–24 months | 0.913<br>0.691<br>0.610                    |
| Active Engagement         | binary         | ID                                | $X^2_{(2)} = 273.43$  | 0.0133       | 6 vs 12 months<br>12 vs 18–24 months<br>6 vs 18–24 months | 0.796<br>0.009<br>0.010                    |
| Companionability          | binary         | ID                                | $X^2_{(2)} = 272.41$  | 0.7894       | 6 vs 12 months<br>12 vs 18–24 months<br>6 vs 18–24 months | 0.489<br>0.568<br>0.924                    |
| Trainability              | log10          | ID                                | $F_{(2,138)} = 2.40$  | 0.09         | 6 vs 12 months<br>12 vs 18–24 months<br>6 vs 18–24 months | 0.110<br>0.616<br>0.040                    |
| Controllability           | none           | ID                                | $F_{(2,138)} = 11.09$ | < 0.0001     | 6 vs 12 months<br>12 vs 18–24 months<br>6 vs 18–24 months | 0.003<br>0.093<br>< 0.0001                 |
| Aggression towards Dogs   | double log     | ID nested within litter           | $F_{(2,138)} = 19.48$ | < 0.0001     | 6 vs 12 months<br>12 vs 18–24 months<br>6 vs 18–24 months | 0.002<br>0.003<br>< 0.0001                 |
| Prey Drive                | square-root    | ID                                | $F_{(2,138)} = 0.03$  | 0.97         | 6 vs 12 months<br>12 vs 18–24 months<br>6 vs 18–24 months | 0.813<br>0.891<br>0.927                    |
| Dominance over other Dogs | none           | ID                                | $F_{(2,138)} = 2.64$  | 0.075        | 6 vs 12 months<br>12 vs 18–24 months<br>6 vs 18–24 months | 0.104<br>0.550<br>0.030                    |
